# Supplementary material for: Multiplex Assays in Allergy Diagnosis: Allergy Explorer 2 versus ImmunoCAP ISAC E112i
Source: MDPI journal article supplement (doi:10.3390/diagnostics14100976), 2024-05-08

CCD INHIBITION in ALEX<sup>2</sup>

| MUXF3 + [n] | MUXF3 + [%] | MUXF3 + and Hom s LF + [n] | MUXF3 + and Hom s LF + [%] | MUXF3 + and Hom s LF - [n] | MUXF3 + and Hom s LF - [%] |
|-------------|-------------|----------------------------|----------------------------|----------------------------|----------------------------|
| 52/216      | 24.1        | 6/52                       | 11.5                       | 46/52                      | 88.5                       |

MUXF3 positive in ISAC and Hom s LF positive in ALEX<sup>2</sup>  
NO INHIBITION (11.5%)

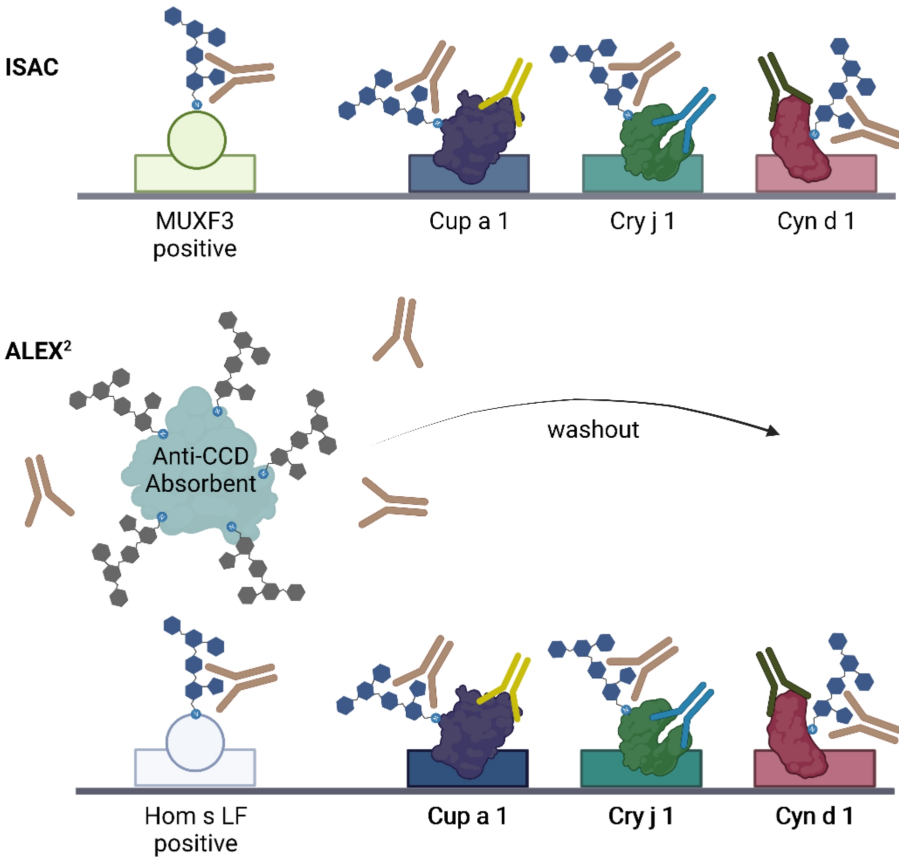

MUXF3 positive in ISAC and Hom s LF negative in ALEX<sup>2</sup>  
INHIBITION (88.5%)

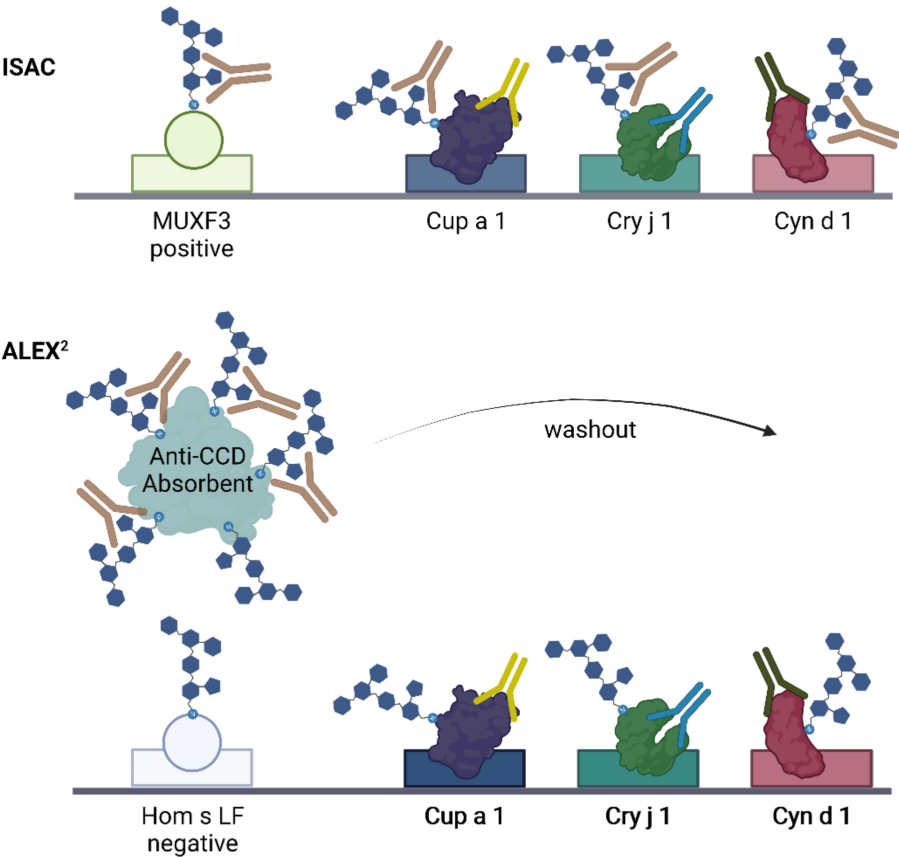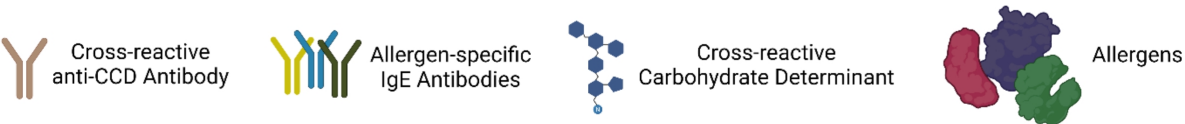

Supplement: s1 [file s1]
