# Supplementary material for: Multiplex Assays in Allergy Diagnosis: Allergy Explorer 2 versus ImmunoCAP ISAC E112i
Source: MDPI journal article supplement (doi:10.3390/diagnostics14100976), 2024-05-08
Supplement: s1 [file s1]

Table S1. Correlation between Sensitization, Allergy Symptoms, and Pollen/Spore Calendar.  
Demographic and Clinical Data of Patients with Allergies.

| Patients with any sensitization to | Match of allergy symptoms with pollen/spore calendar when ALEX <sup>2</sup> was used to analyze sensitization | Match of allergy symptoms with pollen/spore calendar when ISAC was used to analyze sensitization |
|------------------------------------|---------------------------------------------------------------------------------------------------------------|--------------------------------------------------------------------------------------------------|
|                                    | [%]                                                                                                           | [%]                                                                                              |
| Alternaria*                        | 81.8                                                                                                          | 80.0                                                                                             |
| Grass pollen                       | 76.7                                                                                                          | 77.9                                                                                             |
| Tree pollen                        | 50.6                                                                                                          | 55.0                                                                                             |
| Weed pollen                        | 41.0                                                                                                          | 38.4                                                                                             |

\*For all the Alternaria sensitizations, co-sensitization with pollen allergens was present.
