# Supplementary material for: Multiplex Assays in Allergy Diagnosis: Allergy Explorer 2 versus ImmunoCAP ISAC E112i
Source: MDPI journal article supplement (doi:10.3390/diagnostics14100976), 2024-05-08

a. Comparison of ALEX<sup>2</sup> extracts with corresponding ALEX<sup>2</sup> components

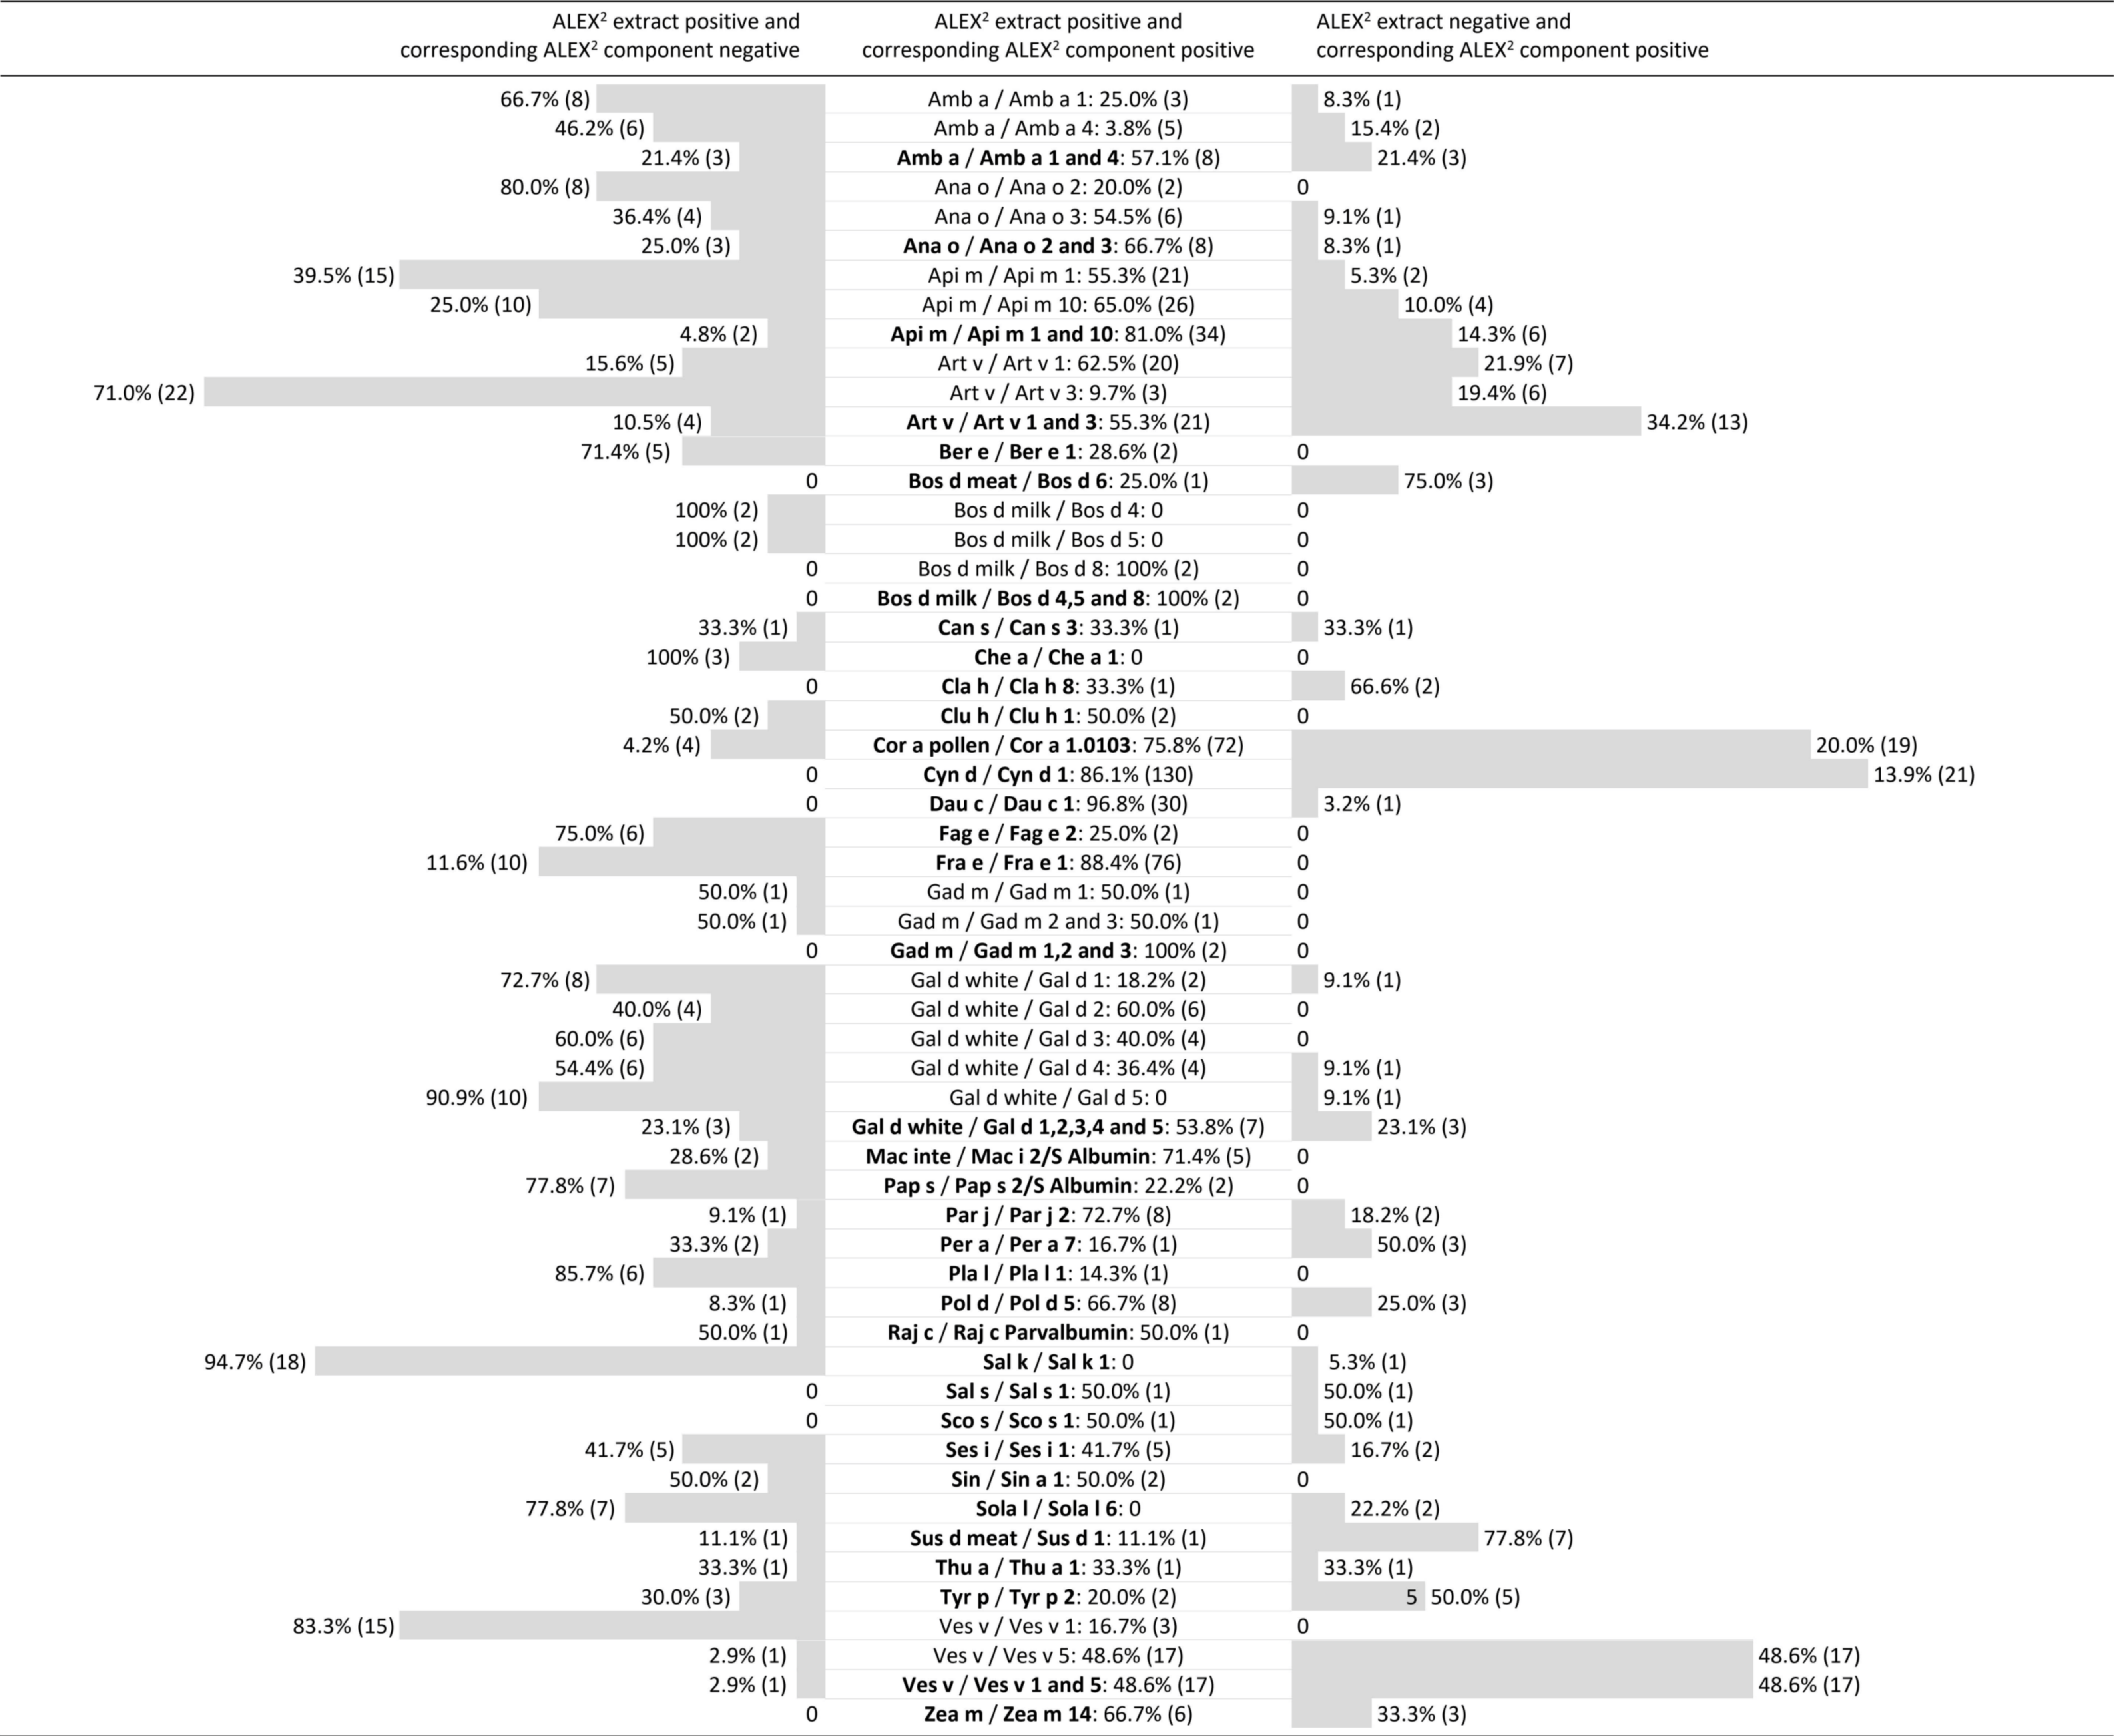

b. Comparison of ALEX<sup>2</sup> extracts with corresponding ISAC components

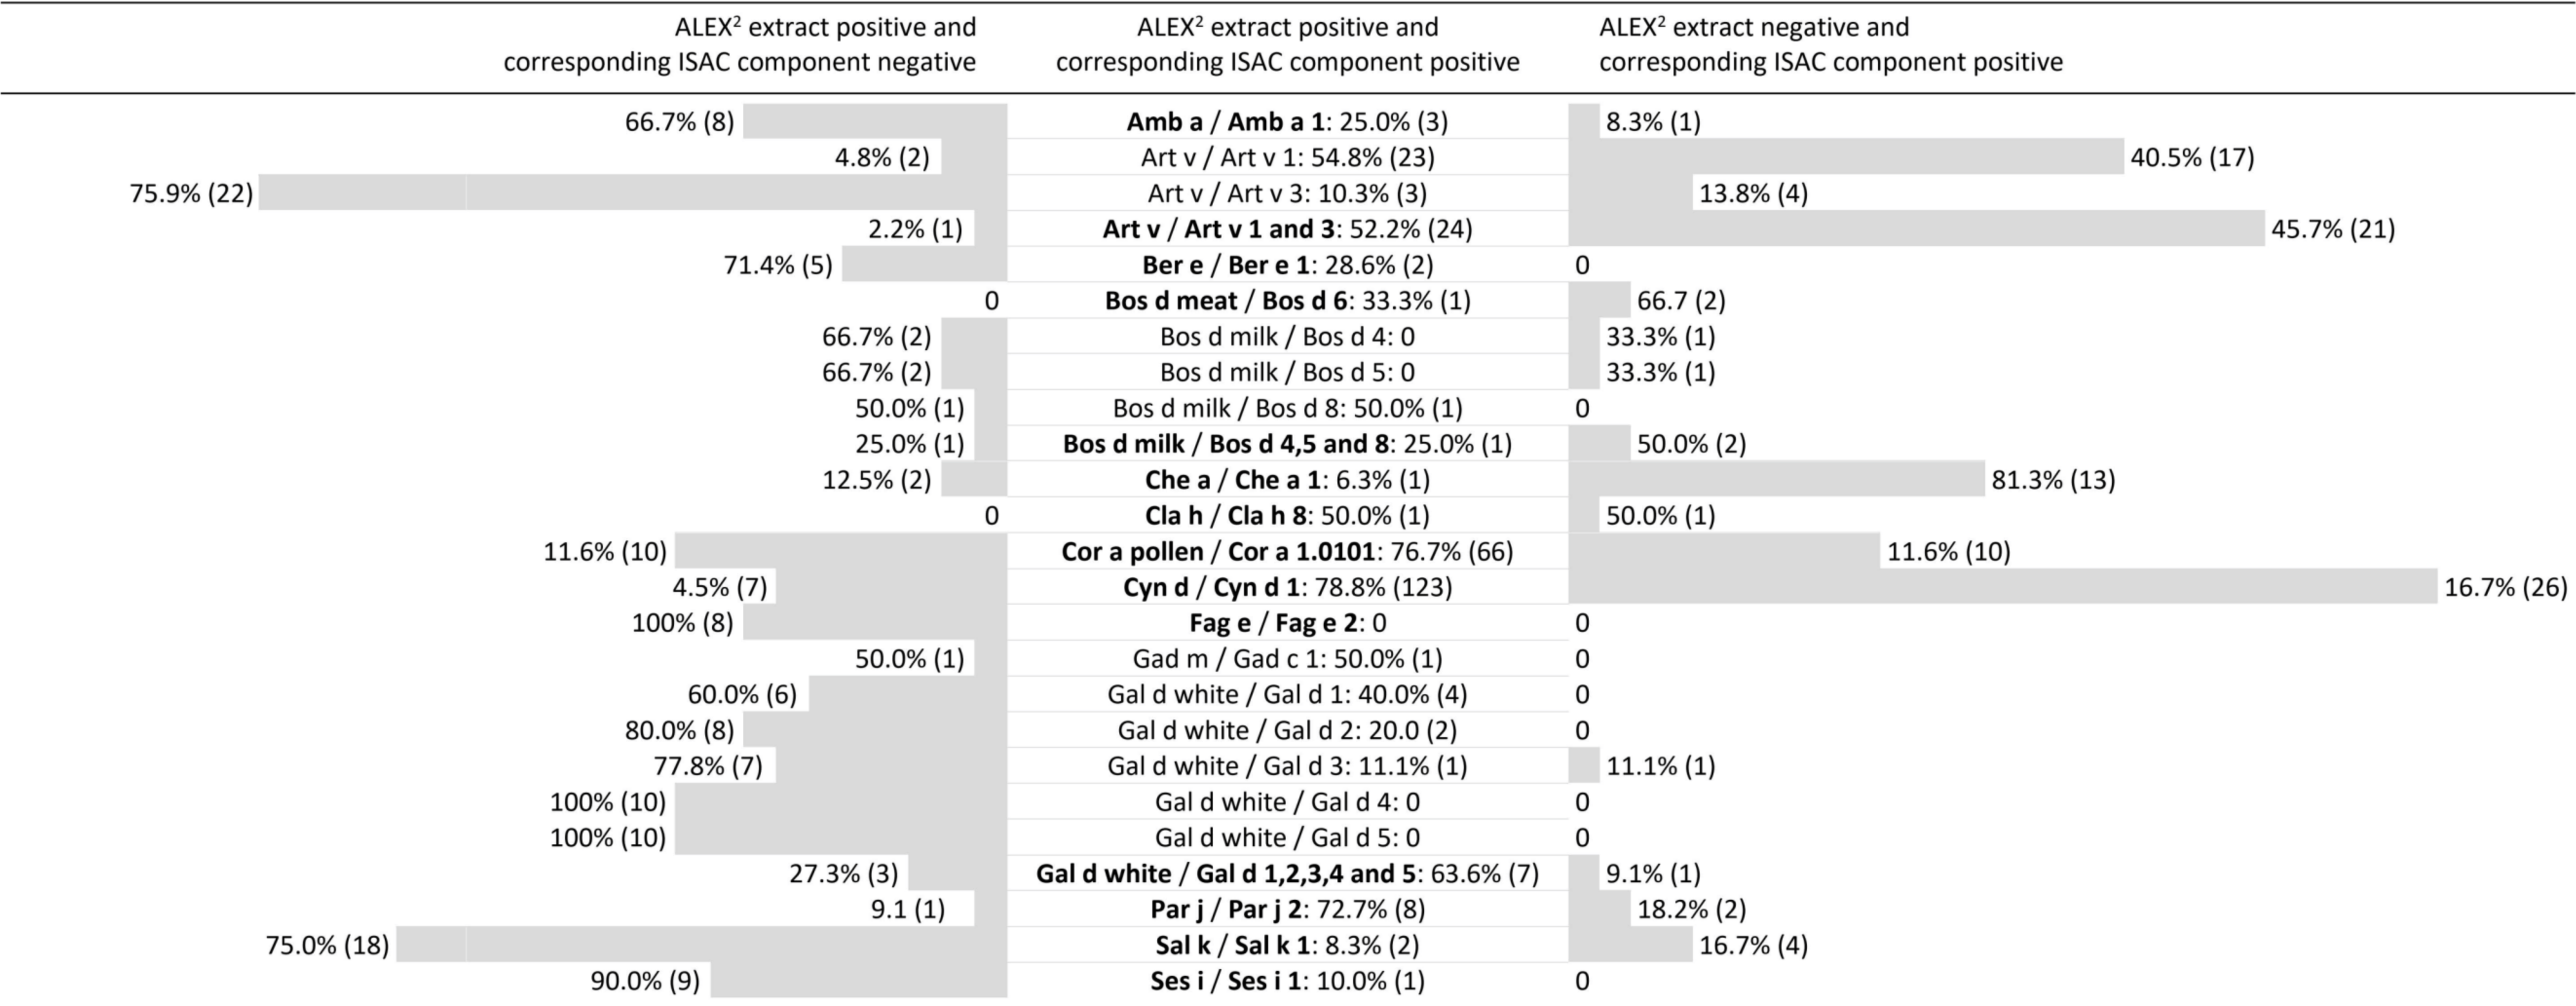

Supplement: s1 [file s1]
